# Supplementary material for: Dissecting CD8+ T cell pathology of severe SARS-CoV-2 infection by single-cell immunoprofiling
Source: Front Immunol. 2022 Dec 16;13:1066176. doi: 10.3389/fimmu.2022.1066176 (PMC9800604; doi:10.3389/fimmu.2022.1066176)
Supplement: Supplementary file 1 [file DataSheet_1.pdf]

# Supplementary Material

## 1 Supplementary Tables and Figures

### 1.1 Supplementary Figures

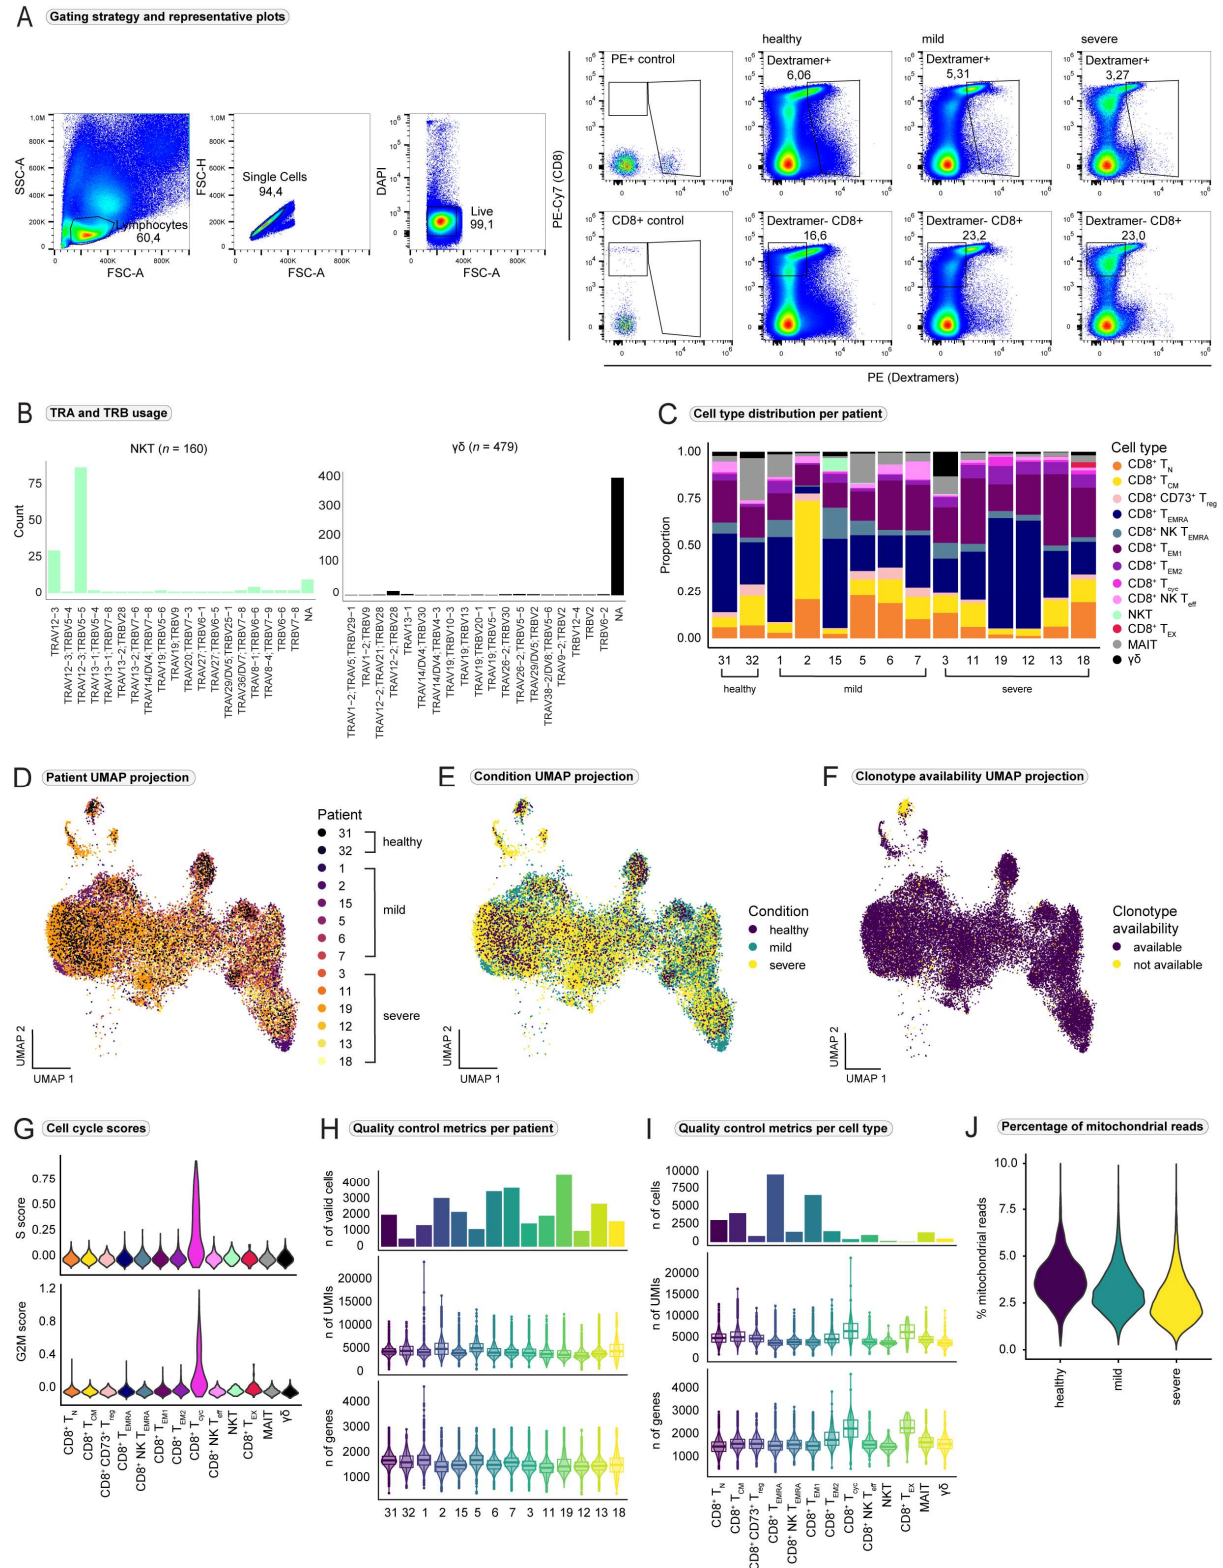

**Figure S1. Additional information on the generation of single-cell data.** (A) FACS gating strategy. Two different populations were sorted for, a PE<sup>+</sup> (Dextramer reagent-positive) and a CD8<sup>+</sup> PE<sup>-</sup> population. (B) T cell receptor alpha (TRA) and T cell receptor beta chain (TRB) usage in atypical NKT cells and  $\gamma\delta$  T cells. (C) Distribution of CD8<sup>+</sup> T cell subsets per patient. (D) Per patient-origin and (E) per condition-origin projected onto the integrated UMAP. (F) Clonotype availability per cell projected onto the integrated UMAP. (G) Cell cycle scores per CD8<sup>+</sup> T cell subtype. (H) Overall single-cell RNA-seq data quality control metrics per patient. (I) Overall single-cell RNA-seq data quality control metrics per cell type. (J) Percentage of mitochondrial read content per condition. PE, phycoerythrin; UMI, unique molecular identifier.

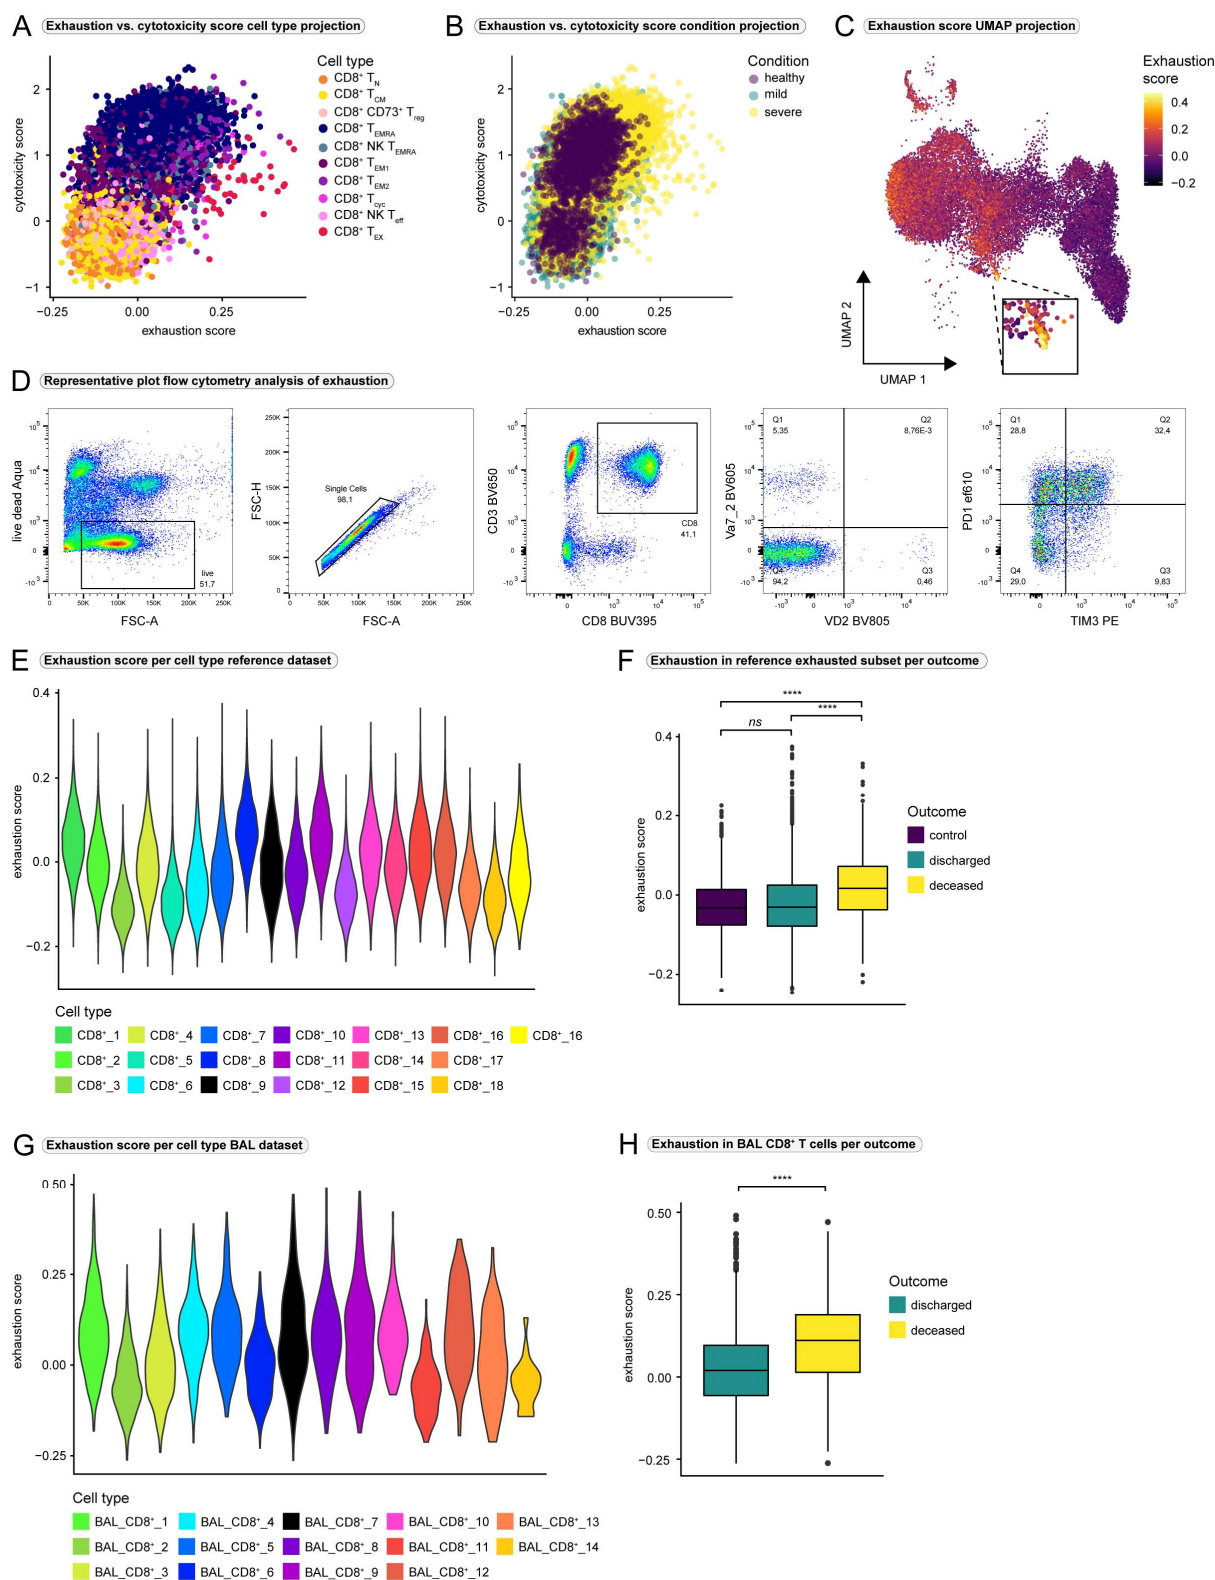

**Figure S2. CD8<sup>+</sup> T cell exhaustion in COVID-19.** (A) Cell type projection of the relationship between T cell exhaustion and cytotoxicity. Each single CD8<sup>+</sup> T cell is placed in the coordinate system according to its individual exhaustion and cytotoxicity score value with cell type-specific colors. (B) Condition projection of the relationship between T cell exhaustion and cytotoxicity. (C) UMAP projection of exhaustion scores with a magnification of the area where

the exhausted T cells are located. **(D)** Representative gating strategy of the flow cytometry analysis of exhaustion in CD8<sup>+</sup> T cells. After exclusion of dead cells and doublets, we first gated on CD8<sup>+</sup> T cells. By gating on TCR Vδ2<sup>-</sup> and TCR Vα7.2<sup>-</sup> cells we excluded major populations of γδ T cells and MAIT cells. Finally, we quantified the frequency of cells expressing different combinations of the exhaustion markers PD-1 and TIM3. **(E)** Violin plot of the exhaustion score per cell type in the PBMC-derived reference dataset. **(F)** Exhaustion scores per outcome in cells from the reference dataset that mapped to exhausted CD8<sup>+</sup> T cells in the query dataset. (Kruskal-Wallis test:  $H(2) = 245.9$ ,  $p < 0.0001$ ; control vs. discharged:  $p = 0.0525$ ; control vs. deceased:  $p < 0.0001$ , discharged vs. deceased:  $p < 0.0001$ ) **(G)** Violin plot of the exhaustion score per cell type in the BAL-derived reference dataset. **(H)** Exhaustion scores per outcome in CD8<sup>+</sup> T cells from bronchoalveolar lavage fluid. (Kolmogorov-Smirnov test:  $D = 0.3033$ ,  $p < 0.0001$ ) BAL, bronchoalveolar lavage.

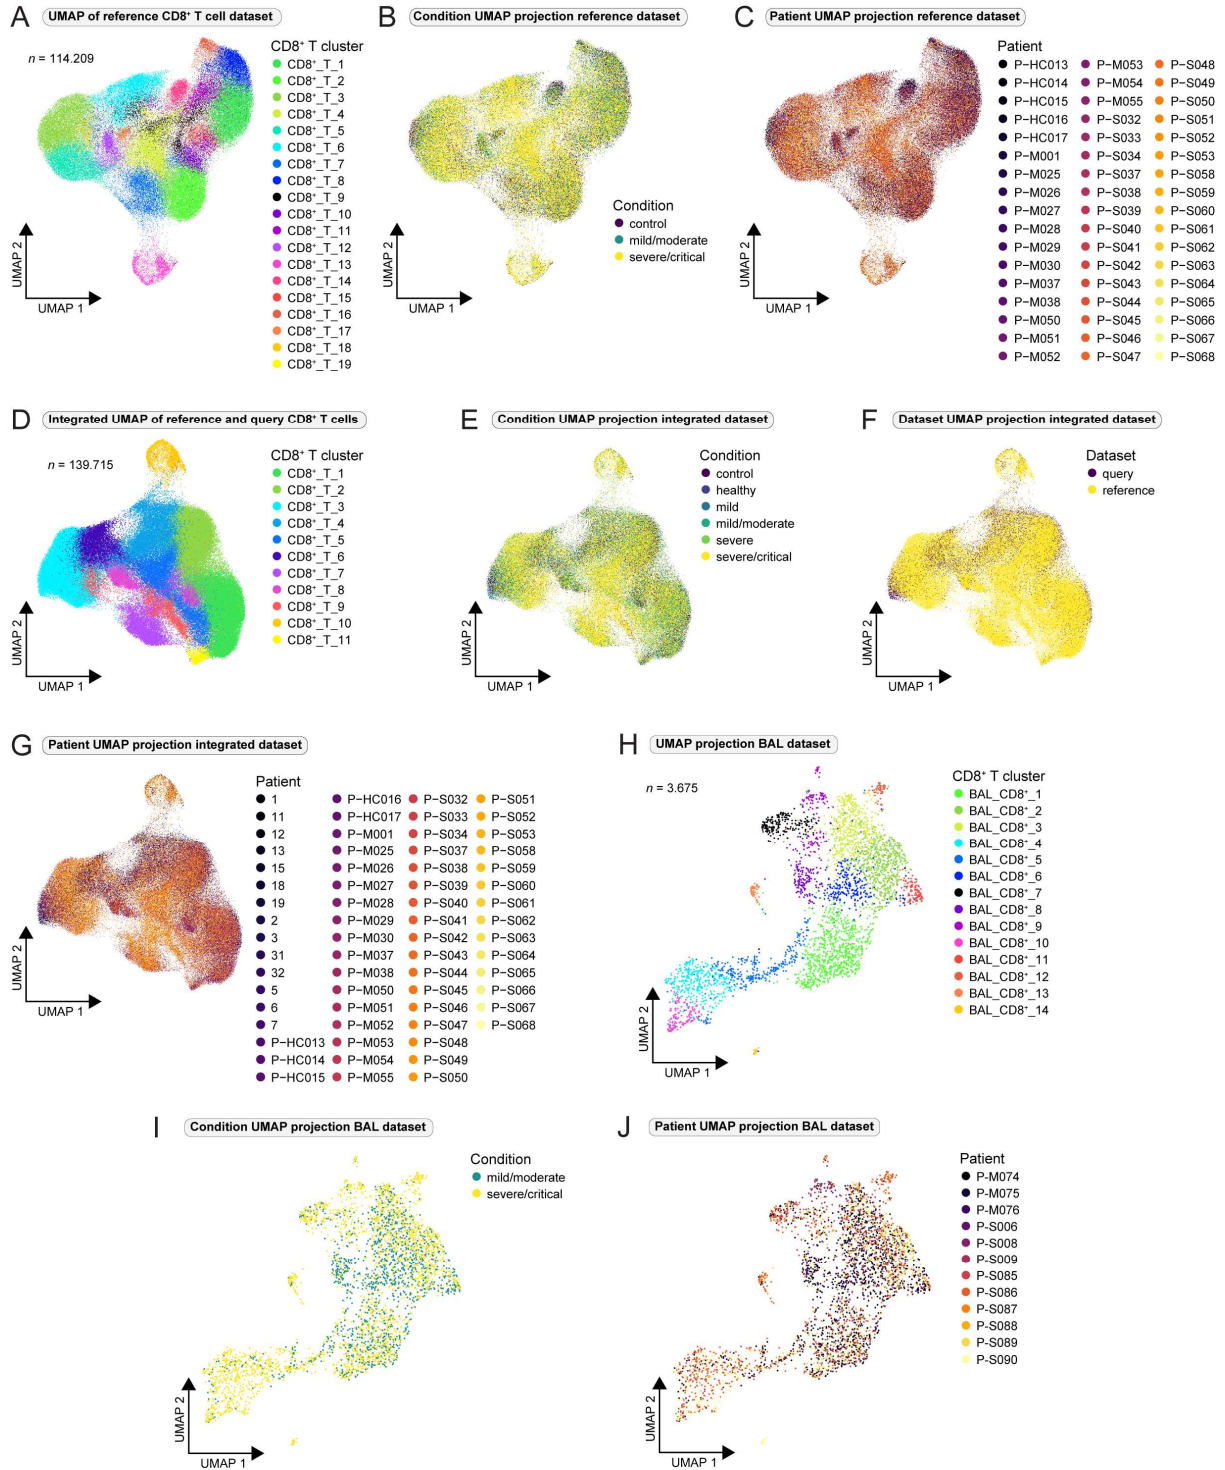

**Figure S3. UMAP embeddings of reference and integrated datasets.** (A) UMAP embedding of the PBMC-derived reference CD8<sup>+</sup> T cell dataset ( $n = 114,209$ ). Reference mapping was performed using *Seurat v4*. (B) Per condition-origin and (C) per patient-origin projected onto the UMAP of the PBMC-derived reference CD8<sup>+</sup> T cell dataset. (D) UMAP embedding of the integrated CD8<sup>+</sup> T cell dataset (our query dataset with the PBMC-derived reference dataset,  $n = 139,715$ ). (E) Per condition-origin, (F) per dataset-origin and (G) per patient-origin projected onto the UMAP of the integrated query and reference CD8<sup>+</sup> T cell datasets. (H) UMAP embedding of the BAL-derived CD8<sup>+</sup> T cell reference dataset ( $n = 3,675$ ). (I) Per condition-

origin and **(J)** per patient-origin projected onto the UMAP of the BAL-derived reference CD8<sup>+</sup> T cell dataset. BAL, bronchoalveolar lavage.

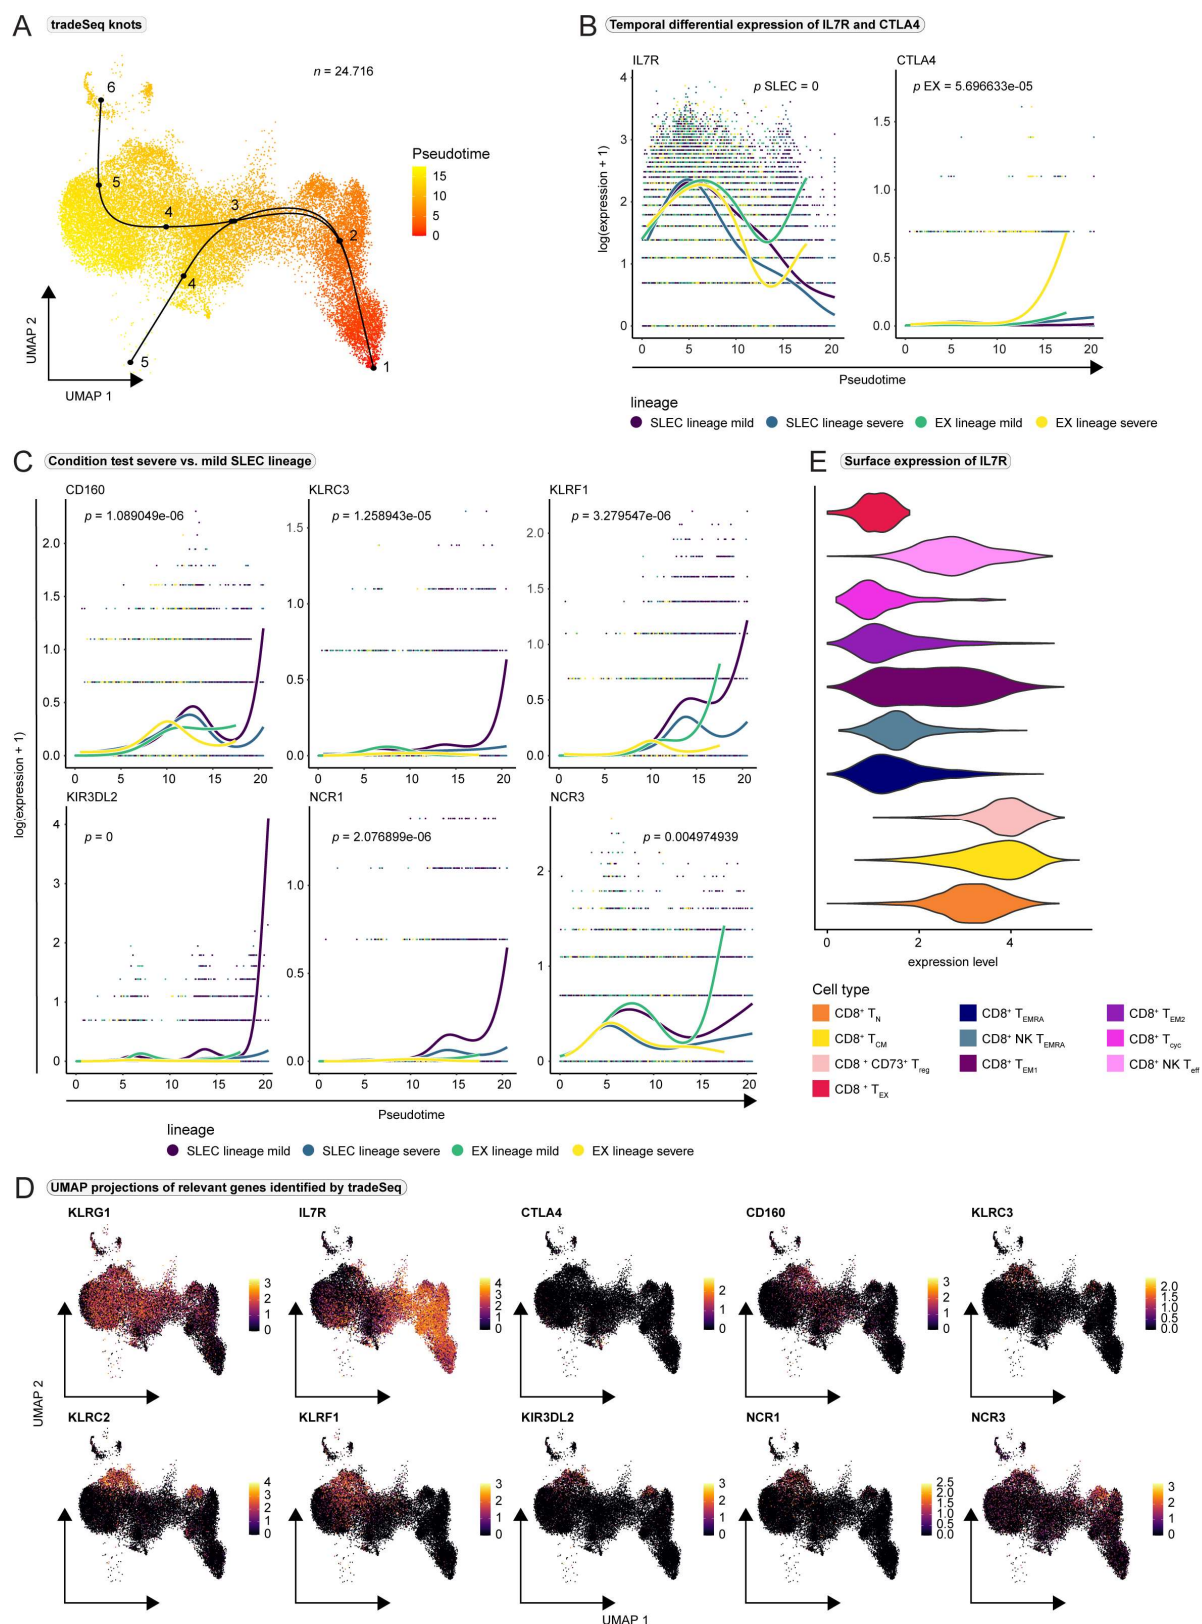

**Figure S4. Relevant genes in CD8<sup>+</sup> T cell differentiation during SARS-CoV-2 infection identified by tradeSeq.** (A) tradeSeq knots that subdivide pseudotime into partitions, projected onto the integrated UMAP. (B) Smoothed expression of *IL7R* and *CTLA4* across pseudotime with the y-axis on natural logarithmic scale.  $p$ -values report the result of differential expression

analysis between progenitor and differentiated cell states across pseudotime (start vs. end testing) for the indicated lineage. **(C)** Smoothed expression of selected NK cell-related genes, which are expressed at significantly higher amounts during SLEC differentiation in mild compared to severe COVID-19 (condition testing). **(D)** UMAP projections of relevant genes from *start vs. end testing* and *condition testing*. **(E)** Surface expression of IL7R (CITE-seq) in CD8<sup>+</sup> T cell subtypes. SLEC, short-lived effector cells; EX, exhaustion lineage.



of CDR3 sequences per condition for the TRB chain. **(D)** Distribution of clonal expansion per cell type within each condition of the PBMC-derived DC8<sup>+</sup> reference dataset, displayed as relative abundance of clonotype expansion groupings. **(E)** Distribution of clonal expansion per cell type within each condition in the BAL-derived CD8<sup>+</sup> reference dataset, displayed as relative abundance of clonotype expansion groupings. **(F)** *FCGR3A* and *KLRF1* expression in the BAL-derived CD8<sup>+</sup> reference dataset. TCR, T cell receptor; TRA, T cell receptor alpha chain; TRB, T cell receptor beta chain; CDR3, Complementarity determining region 3; BAL, bronchoalveolar lavage.

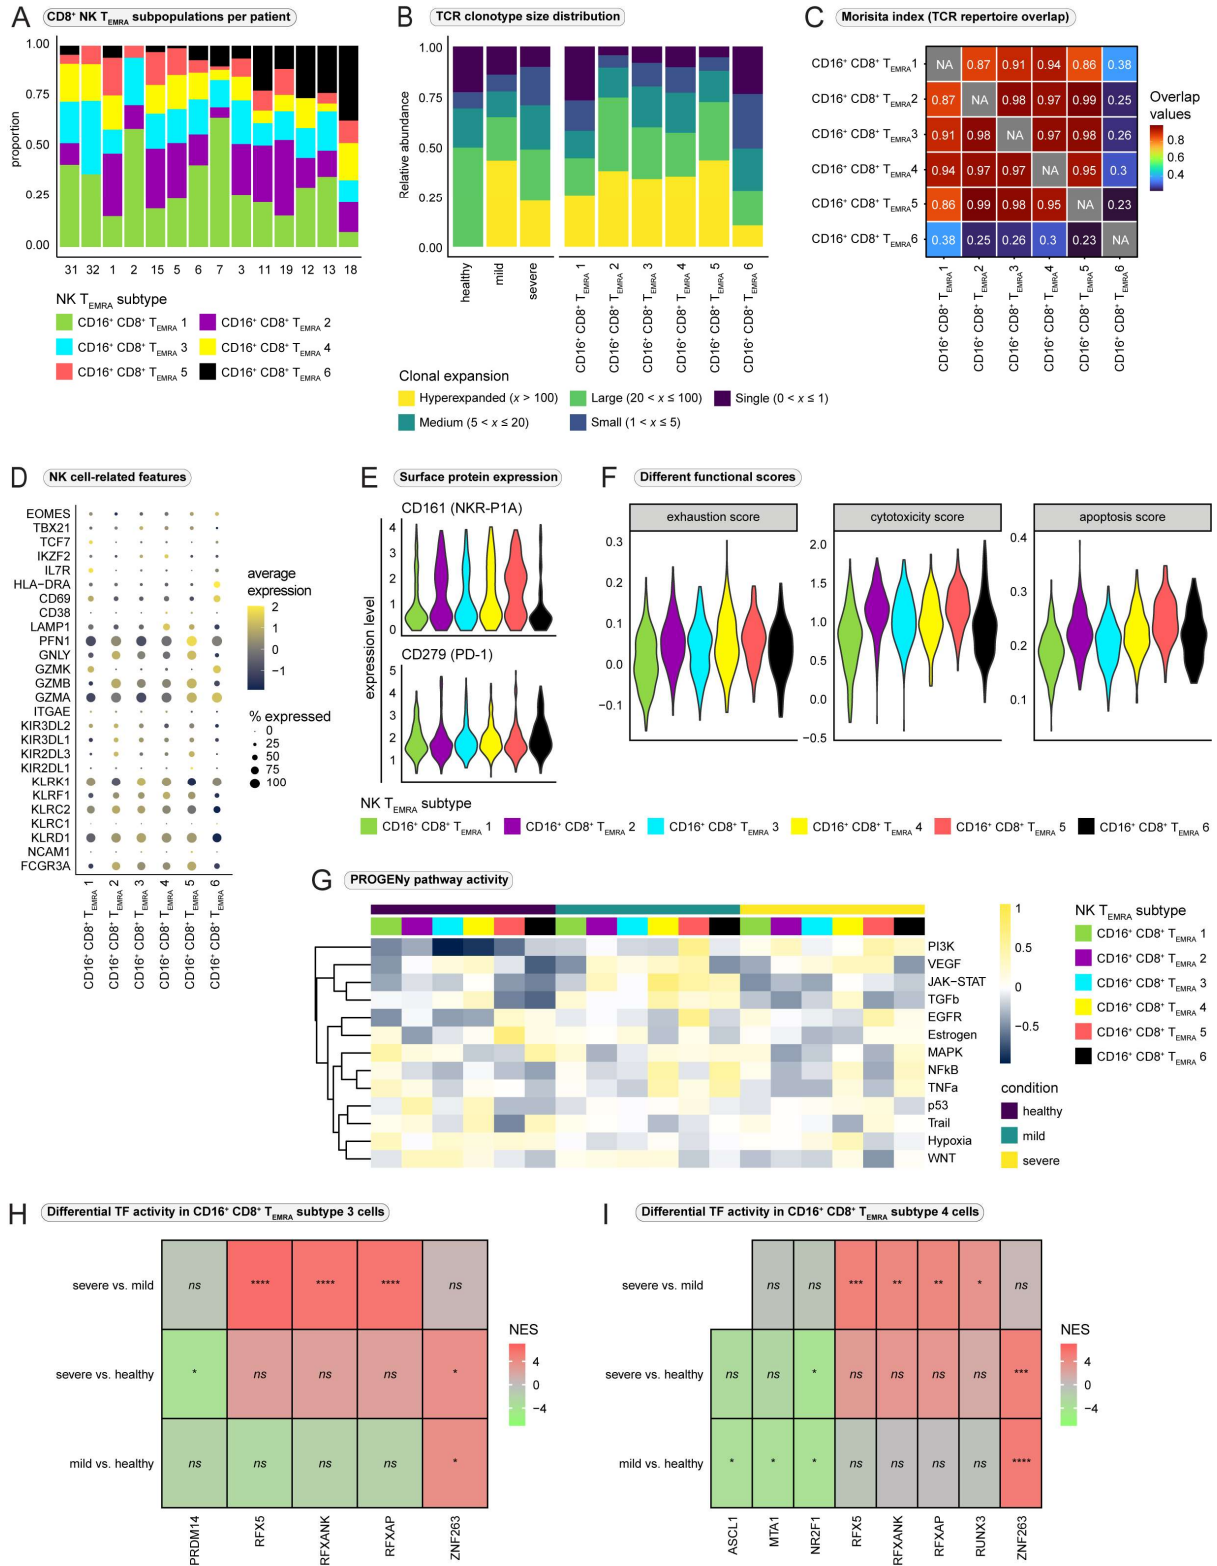

**Figure S6. Heterogeneity among CD8<sup>+</sup> NK-like terminally differentiated effector memory T cells re-expressing CD45RA.** (A) Distribution of CD16<sup>+</sup> CD8<sup>+</sup> T<sub>EMRA</sub> subsets per patient. (B) Distribution of clonal expansion within the conditions (left) and within the CD16<sup>+</sup> CD8<sup>+</sup> T<sub>EMRA</sub> populations (right), displayed as relative abundance of clonotype expansion groupings. (C) Overlap in TCR repertoire between the CD16<sup>+</sup> CD8<sup>+</sup> T<sub>EMRA</sub> populations estimated with Morisita index. (D) Average expression of selected genes related to NK cell phenotype and

function in the six CD16<sup>+</sup> CD8<sup>+</sup> T<sub>EMRA</sub> subsets. **(E)** Surface expression (CITE-seq) of CD161 and CD279 per CD16<sup>+</sup> CD8<sup>+</sup> T<sub>EMRA</sub> subtype. **(F)** Exhaustion, cytotoxicity and apoptosis scores for the six CD16<sup>+</sup> CD8<sup>+</sup> T<sub>EMRA</sub> subsets. **(G)** Pathway activity for all computed PROGENy pathways in CD16<sup>+</sup> CD8<sup>+</sup> T<sub>EMRA</sub> cells. **(H)** Differential transcription factor activity (DoRothEA) estimated with *msviper* in CD16<sup>+</sup> CD8<sup>+</sup> T<sub>EMRA</sub>-3 cells and **(I)** in CD16<sup>+</sup> CD8<sup>+</sup> T<sub>EMRA</sub>-4 cells between the severe and the mild condition. Positive NES values indicate increased activity in severe SARS-CoV-2 infection. TCR, T cell receptor; TF, transcription factor; NES, normalized enrichment score.

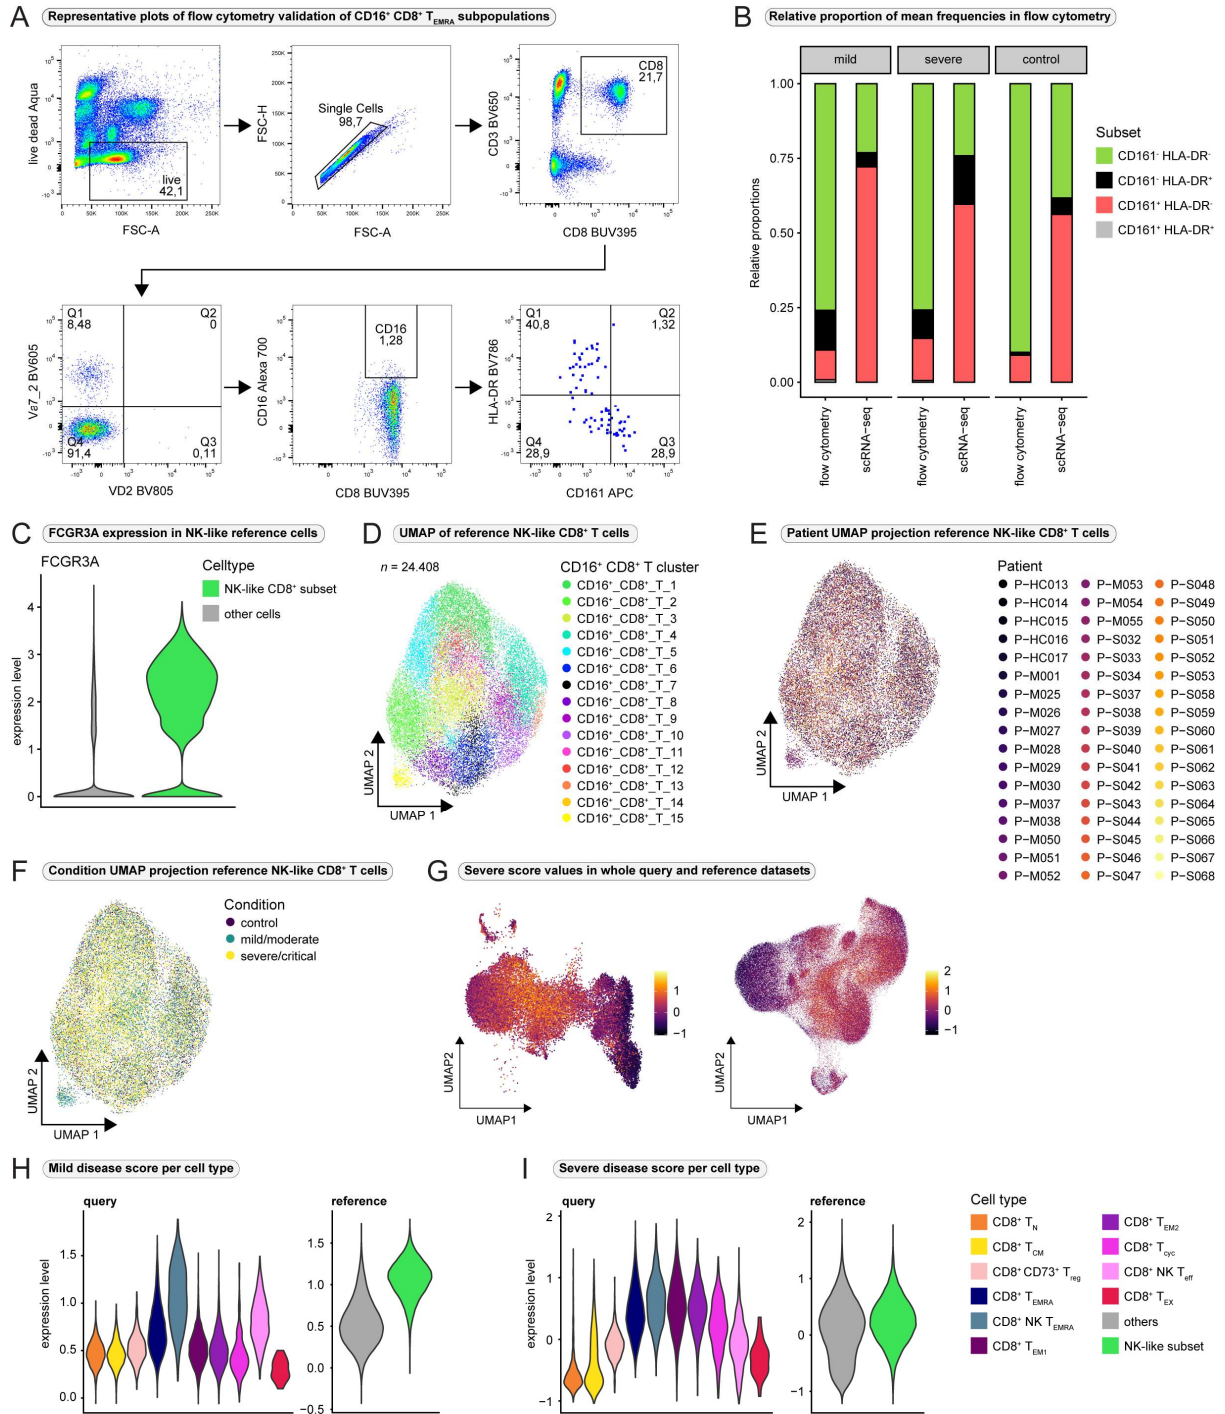

**Figure S7. Validation of CD16<sup>+</sup> CD8<sup>+</sup> T<sub>EMRA</sub> cells and mild and severe disease scores. (A)** Representative gating strategy of the flow cytometry analysis for the validation of the existence of CD16<sup>+</sup> CD8<sup>+</sup> T<sub>EMRA</sub> subsets. After exclusion of dead cells and doublets, we first gated on CD8<sup>+</sup> T cells. By gating on TCR Vδ2<sup>-</sup> and TCR Vα7.2<sup>-</sup> cells we excluded major populations of γδ T cells and MAIT cells. Finally, we gated on CD16<sup>+</sup> cells and quantified the frequency of cells expressing different combinations of HLA-DR and CD161. **(B)** Relative proportions of the mean frequencies of CD16<sup>+</sup> CD8<sup>+</sup> T<sub>EMRA</sub> subsets per condition as observed by flow cytometry vs. scRNA-seq. **(C)** *FCGR3A* expression plotted for all cells in the reference CD8<sup>+</sup> T cell dataset that mapped together with our CD8<sup>+</sup> NK-like T<sub>EMRA</sub> cells in the integrated dataset

(NK-like CD8<sup>+</sup> subset) and for all other cells in the reference dataset (other cells). **(D)** UMAP embedding of the subclustered NK-like CD8<sup>+</sup> T cell subset from the reference dataset ( $n = 24,408$ ). **(E)** Per patient-origin and **(F)** per condition-origin projected onto the UMAP of the NK-like CD8<sup>+</sup> T cell subset from the reference CD8<sup>+</sup> T cell dataset. **(G)** Severe disease score values projected onto the UMAP embeddings of our CD8<sup>+</sup> T cell dataset (left) and the reference CD8<sup>+</sup> T cell dataset (right). **(H)** Mild and **(I)** severe disease score values per CD8<sup>+</sup> T cell type in our query dataset (left panels) and the NK-like CD8<sup>+</sup> T cell subset compared with all other CD8<sup>+</sup> T cells in the reference dataset (right panels).

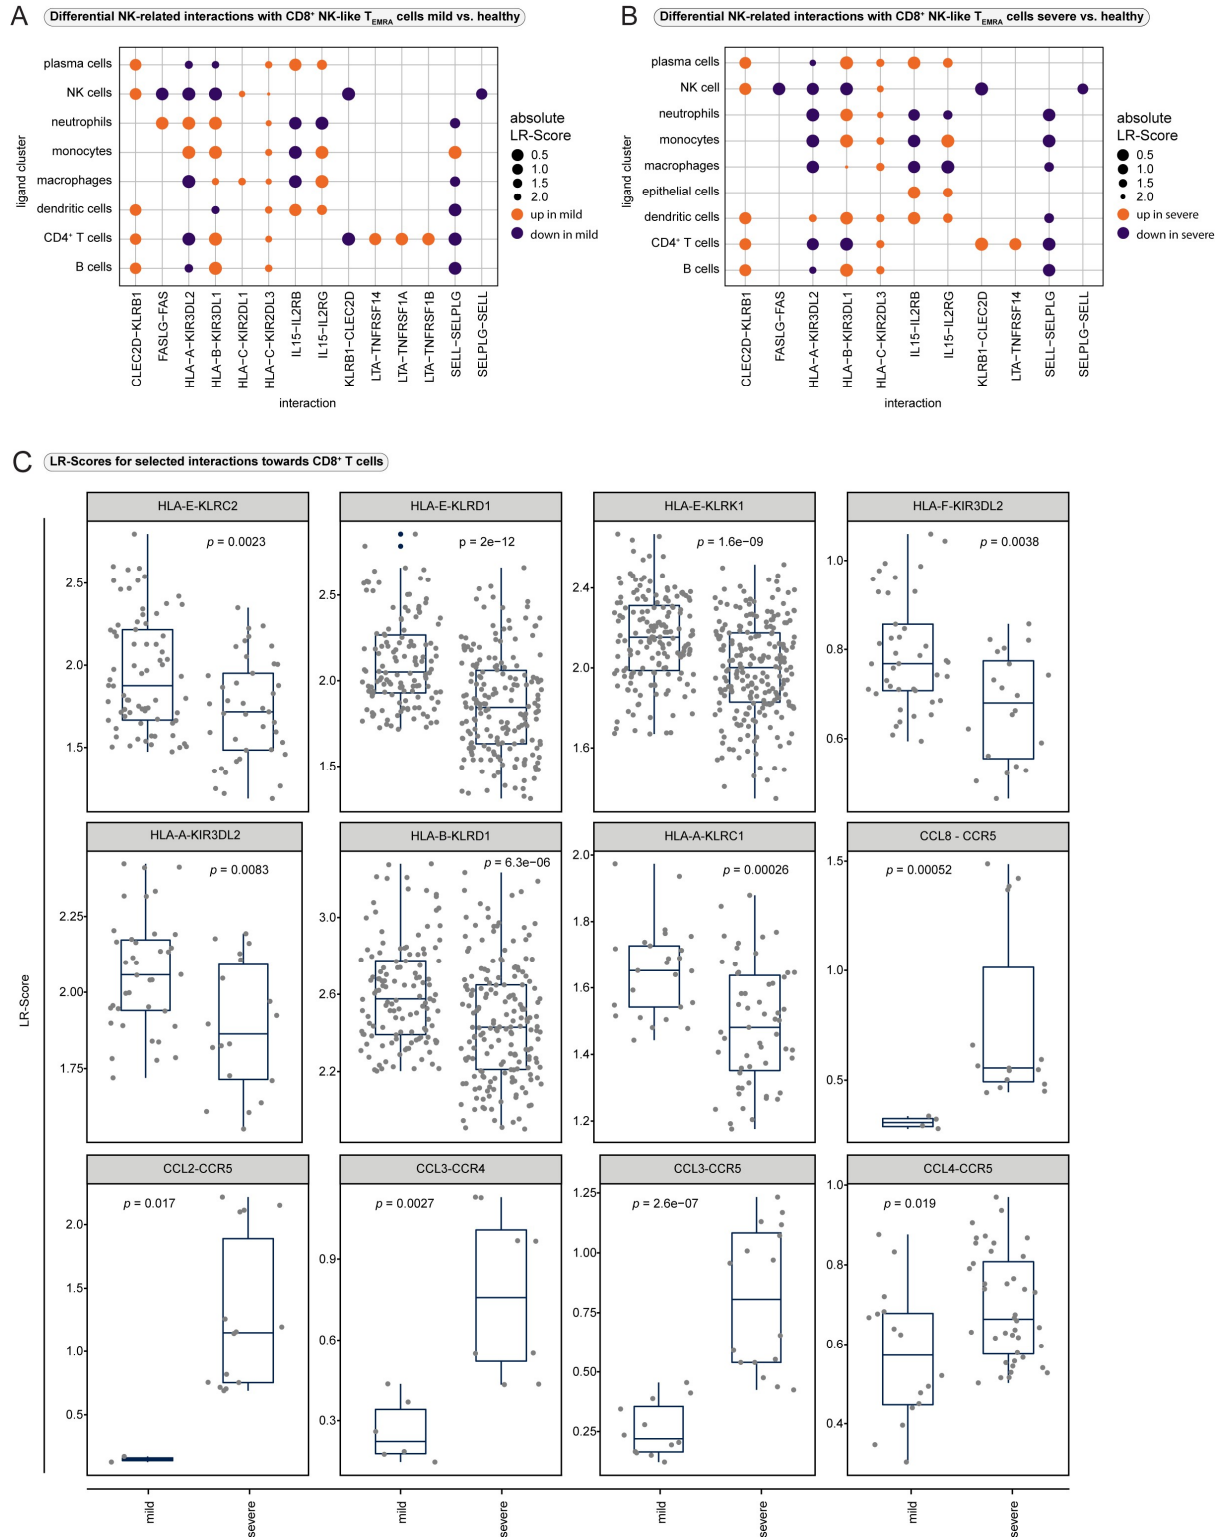

**Figure S8. Additional cell-cell interactions.** (A) Differential ligand-receptor interactions between mild COVID-19 and healthy controls and (B) severe COVID-19 and healthy controls. To assess interactions between CD8<sup>+</sup> T cells and non-T cells our dataset was integrated with the whole reference dataset and interactions were predicted using *LIANA*. Differential interactions were then calculated using CrossTalker for selected interactions, relevant in NK cell development and function. A group of ligand clusters was selected and NK-like CD8<sup>+</sup>

T<sub>EMRA</sub> cells were regarded as receptor cluster. The size of the dots indicates the absolute value of the differential LR-Score. The color indicates the direction of the change in ligand-receptor interactions; orange indicates increased interactions in the disease condition, purple indicates decreased interactions in the disease condition. **(C)** Boxplots displaying differences in LR-Scores for selected NK cell receptor and CC chemokine interactions between severe and mild COVID-19. All CD8<sup>+</sup> T cell populations were regarded as receptor population and all other populations (except megakaryocytes) were regarded as ligand population for this purpose. LR-Score, ligand-receptor score.

## 1.2 Supplementary Tables

**Table S1. CITE-Seq antibody panel**

| Antibody                                                              | Source    | Catalog number |
|-----------------------------------------------------------------------|-----------|----------------|
| TotalSeqTM-C0092 Mouse IgG2b, $\kappa$ isotype Ctrl (Clone: MPC-11)   | BioLegend | 400381         |
| TotalSeqTM-C0091 Mouse IgG2a, $\kappa$ isotype Ctrl (Clone: MOPC-173) | BioLegend | 400293         |
| TotalSeqTM-C0090 Mouse IgG1, $\kappa$ isotype Ctrl (Clone: MOPC-21)   | BioLegend | 400187         |
| TotalSeqTM-C0063 anti-human CD45RA, (Clone: HI-100)                   | BioLegend | 304163         |
| TotalSeqTM-C0088 anti-human CD279 (PD-1), (Clone: EH12.2H7)           | BioLegend | 329963         |
| TotalSeqTM-C0087 anti-human CD45RO, (Clone: UCHL1)                    | BioLegend | 304259         |
| TotalSeqTM-C0159 anti-human HLA-DR, (Clone: L243)                     | BioLegend | 307663         |
| TotalSeqTM-C0149 anti-human CD161, (Clone: HP-3G10)                   | BioLegend | 339947         |
| TotalSeqTM-C0081 anti-human CD14, (Clone: M5E2)                       | BioLegend | 301859         |
| TotalSeqTM-C0148 anti-human CD197 (CCR7), (Clone: G043H7)             | BioLegend | 353251         |
| TotalSeqTM-C0390 anti-human CD127 (IL-7R $\alpha$ ), (Clone: A019D5)  | BioLegend | 351356         |
| TotalSeqTM-C0050 anti-human CD19, (Clone: HIB19)                      | BioLegend | 302265         |
| TotalSeqTM-C0080 anti-human CD8a, (Clone: RPA-T8)                     | BioLegend | 301071         |
| TotalSeqTM-C0072 anti-human CD4, (Clone: RPA-T4)                      | BioLegend | 300567         |
| TotalSeqTM-C0034 anti-human CD3, (Clone: UCHT1)                       | BioLegend | 300479         |

**Table S2. Clinical data**

| <b>Patient</b> | <b>Sex</b> | <b>Age</b> | <b>ICU</b> | <b>Ventilation</b> | <b>Days since first positive PCR</b> | <b>Status of infection at time of sampling</b> | <b>SARS-CoV-2 IgG antibody test result</b> | <b>Group</b> |
|----------------|------------|------------|------------|--------------------|--------------------------------------|------------------------------------------------|--------------------------------------------|--------------|
| P01            | female     | 78         | no         | no                 | 5                                    | positive                                       | negative                                   | mild         |
| P02            | female     | 77         | no         | no                 | 7                                    | positive                                       | negative                                   | mild         |
| P03            | male       | 64         | yes        | yes                | 12                                   | positive                                       | positive                                   | severe       |
| P05            | female     | 27         | no         | no                 | 50                                   | negative                                       | negative                                   | mild         |
| P06            | male       | 28         | no         | no                 | 58                                   | negative                                       | negative                                   | mild         |
| P07            | female     | 25         | no         | no                 | 57                                   | negative                                       | indeterminate                              | mild         |
| P11            | male       | 56         | yes        | yes                | 57                                   | positive                                       | positive                                   | severe       |
| P12            | female     | 67         | yes        | yes                | 55                                   | negative                                       | indeterminate                              | severe       |
| P13            | female     | 62         | yes        | yes                | 49                                   | negative                                       | positive                                   | severe       |
| P15            | female     | 75         | no         | no                 | 7                                    | positive                                       | indeterminate                              | mild         |
| P18            | male       | 62         | yes        | yes                | 96                                   | negative                                       | positive                                   | severe       |
| P19            | male       | 82         | yes        | yes                | 11                                   | positive                                       | indeterminate                              | severe       |
| P29            | female     | 52         | -          | -                  | -                                    | -                                              | negative                                   | healthy      |
| P31            | male       | 38         | -          | -                  | -                                    | -                                              | negative                                   | healthy      |
| P32            | male       | 79         | -          | -                  | -                                    | -                                              | negative                                   | healthy      |

ICU = intensive care unit

**Tables S3-S9 are available as [xlsx-files](#)**

**Table S10. Samples from the public dataset that were chosen for integration with our dataset for cell-cell interaction analysis**

| <b>sampleID</b> | <b>PatientID</b> | <b>Condition</b> |
|-----------------|------------------|------------------|
| S-M074-1        | P-M074           | mild/moderate    |
| S-S086-1        | P-S086           | severe/critical  |
| S-M076-1        | P-M076           | mild/moderate    |
| S-S085-1        | P-S085           | severe/critical  |
| S-S087-1        | P-S087           | severe/critical  |
| S-S088-1        | P-S088           | severe/critical  |
| S-S089-1        | P-S089           | severe/critical  |
| S-S090-1        | P-S090           | severe/critical  |
| S-S090-2        | P-S090           | severe/critical  |
| S-M076-2        | P-M076           | mild/moderate    |
| S-M074-2        | P-M074           | mild/moderate    |
| S-S088-2        | P-S088           | severe/critical  |
| S-S085-2        | P-S085           | severe/critical  |
| S-S089-2        | P-S089           | severe/critical  |
| S-S087-2        | P-S087           | severe/critical  |
| S-S086-2        | P-S086           | severe/critical  |
| S-HC003         | P-HC003          | control          |
| S-HC005         | P-HC005          | control          |
| S-HC010         | P-HC010          | control          |
| S-HC011         | P-HC011          | control          |
| S-HC013         | P-HC013          | control          |
| S-HC014         | P-HC014          | control          |

**Table S11 is available as xlsx-files**
